1  
2  
3  
4  
5  
6  
7  
8  
9  
10  
11  
12  
13  
14  
15  
16  
17  
18  
19  
20  
21  
22  
23

**Basal Ganglia role in learning rewarded actions and executing previously learned choices:  
healthy and diseased states**

Garrett Mulcahy<sup>1</sup>, Brady Atwood<sup>2</sup> and Alexey Kuznetsov<sup>3</sup>

<sup>1</sup>Department of Mathematics, Purdue University

<sup>2</sup>Departments of Psychiatry and Pharmacology & Toxicology, IUSM

<sup>3</sup>Department of Mathematical Sciences, IUPUI and Indiana Alcohol Research Center, IUSM

**Short title: Basal Ganglia role in learning and execution of rewarded choices**

**Abstract**

The basal ganglia (BG) is a collection of nuclei located deep beneath the cerebral cortex that is involved in learning and selection of rewarded actions. Here, we analyzed BG mechanisms that enable these functions. We implemented a rate model of a BG-thalamo-cortical loop and simulated its performance in a standard action selection task. We have shown that potentiation of corticostriatal synapses enables learning of a rewarded option. However, these synapses became redundant later as direct connections between prefrontal and premotor cortices (PFC-PMC) were potentiated by Hebbian learning. After we switched the reward to the previously unrewarded option (reversal), the BG was again responsible for switching to the new option. Due to the potentiated direct cortical connections, the system was biased to the previously rewarded choice, and establishing the new choice required a greater number of trials. Guided by physiological research, we then modified our model to reproduce pathological states of mild Parkinson's and Huntington's diseases. We found that in the Parkinsonian state PMC activity levels become

24 extremely variable, which is caused by oscillations arising in the BG-thalamo-cortical loop. The  
25 model reproduced severe impairment of learning and predicted that this is caused by these  
26 oscillations as well as a reduced reward prediction signal. In the Huntington state, the  
27 potentiation of the PFC-PMC connections produced better learning, but altered BG output  
28 disrupted expression of the rewarded choices. This resulted in random switching between  
29 rewarded and unrewarded choices resembling an exploratory phase that never ended. Our results  
30 reconcile the apparent contradiction between the critical involvement of the BG in execution of  
31 previously learned actions and yet no impairment of these actions after BG output is ablated by  
32 lesions or deep brain stimulation. We predict that the cortico-BG-thalamo-cortical loop conforms  
33 to previously learned choice in healthy conditions, but impedes those choices in disease states.

34

### 35 **Author summary**

36 Learning and selection of a rewarded action, as well as avoiding punishments, are known to  
37 involve interaction of cortical and subcortical structures in the brain. The subcortical structure  
38 that is included in this interaction is called Basal Ganglia (BG). Accordingly, diseases that  
39 damage BG, such as Parkinson and Huntington, disrupt action selection functions. A long-  
40 standing puzzle is that abolition of the BG output that disconnects the BG-cortical interaction  
41 does not disrupt execution of previously learned actions. This is the principle that is suggested to  
42 underlie standard Parkinsonian treatments, such as deep brain stimulation. We model the BG-  
43 cortical interaction and reconcile this apparent contradiction. Our simulations show that, while  
44 BG is necessary for learning of new rewarded choices, it is not necessary for the expression of  
45 previously learned actions. Our model predicts that the BG conforms to previously learned  
46 choice in healthy conditions, but impedes those choices in disease states.

## 47 **Introduction**

48           The basal ganglia (BG) is a complex network of excitatory and inhibitory neurons located  
49 in the deep brain of most vertebrates that controls action selection (see e.g. (1)). The BG is  
50 comprised of the dorsal striatum, external and internal portions of the globus pallidus (GPe,  
51 GPi), subthalamic nucleus (STN) and substantia nigra (2). It is traditionally implicated in motor  
52 control since BG lesions are associated with movement disorders (3–5). The BG is a shared  
53 processing center involved in a broad spectrum of motor and cognitive control (2,6). A cortico-  
54 BG-thalamo-cortical neurocircuit loop is suggested to be the structure that provides this control  
55 (7,8). However, understanding how this loop functions remains far from complete and requires  
56 more experimental and theoretical studies.

57           The BG is also widely recognized for its involvement in learning (9–11). Reinforcement  
58 learning is recognized as the mechanism that establishes behavioral responses for rewards, such  
59 as food or drugs of abuse and is altered in numerous disorders and disease states including  
60 Parkinson’s disease (12–14). Reinforcement learning is based on communication between  
61 midbrain dopamine neurons and the striatum (15,13), specifically ventral tegmental area  
62 projections to ventral striatum and substantia nigra pars compacta (SNc) projections to dorsal  
63 striatum (16–18). Dopamine (DA) released by dopaminergic VTA and SNc inputs to striatum  
64 signals the difference between received and expected rewards – the reward prediction error  
65 (RPE) (14). RPE encoding in VTA-NAc neurocircuits involves prediction of reward value which  
66 in turn feeds back to both VTA and SNc dopamine neurons (15). Given its role in motor control,  
67 the SNc-dorsal striatum component of the BG translates RPE into action: the hypothesized critic-  
68 actor roles of these two dopaminergic projections (15,14,19,20). If the RPE is positive, additional  
69 DA release leads to positive reinforcement of the preceding action; if the error is negative

70 (expected more than received), a pause in DA release leads to negative reinforcement and blocks  
71 the action. As a mechanism for this control, DA modulates plasticity of synaptic projections from  
72 the cortex to striatal medium spiny neurons (MSNs) (21,22). As a reflection of the bidirectional  
73 DA modulation, there are two types of MSNs. Those that are responsible for promoting  
74 movement are part of the BG direct pathway and express D1-type dopamine receptors (GO, D1-  
75 MSNs) and those that inhibit movement are part of the BG indirect pathway and express D2  
76 dopamine receptors (NO-GO, D2-MSNs) (23–25). Indirect and direct BG pathways respectively  
77 inhibit or disinhibit the thalamocortical relay neurons responsible for producing particular  
78 movements (26–28). The coordination of activity within the two types of MSNs determines  
79 action (29–31). Within the BG loops, synaptic plasticity of corticostriatal projections is a key  
80 node in the learning of rewarded choices (9–11,22).

81         The BG is suggested to remain involved in action selection after the action-reward  
82 association is learned and control the transition from goal-directed to habitual choices (8,32). On  
83 the other hand, clinical interventions for Parkinson disease (PD) do not cause impairments in  
84 goal-directed or habitual movements (33–35). Specifically, GPi lesions and deep brain  
85 stimulation, which disrupt the main output of the BG, are used to improve motor functions. This  
86 observation gave rise to a hypothesis that the BG play a critical role in learning, but not in the  
87 expression of already learned actions or choices (36,37). These choices are suggested to instead  
88 be stored in synaptic connections within cortex. This hypothesis apparently contradicts the  
89 suggested involvement of the BG in executing actions learned previously. Therefore, it is  
90 essential to fill in this knowledge gap by further investigating the role of the BG in goal-directed  
91 and habitual choices.

92           This paper presents a computational model of the cortico-BG-thalamo-cortical loop  
93 involved in a two-choice instrumental conditioning task (32). This task is standard for assessing  
94 action-reward association in animals and humans. Our model design is similar to a previously  
95 published design (37,38), but focused on choice selection. We implemented two synaptic  
96 mechanisms that can mediate learning: reward-related plasticity of corticostriatal synapses (39)  
97 and activity-dependent Hebbian plasticity (40,41) of cortico-cortical synapses. To elucidate the  
98 role of the BG in Parkinson's and Huntington diseases, we calibrate the model to reflect the  
99 altered BG connectivity documented for these diseases and simulate these changes in BG  
100 activity.  
101

102 **Results**

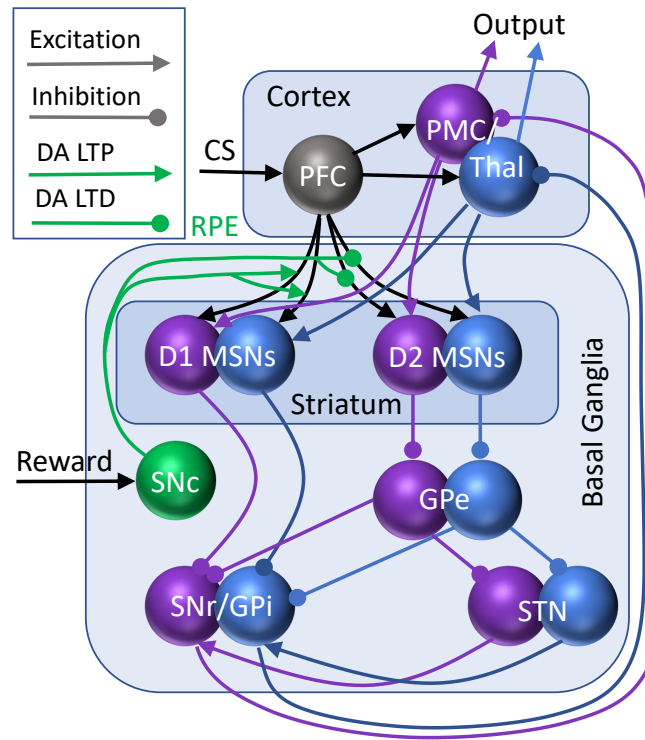

103

104 *Figure 1: The structure of the cortico-basal ganglia-thalamo-cortical loop model. The BG receives inputs*  
105 *from the prefrontal cortex (PFC) signaling the conditioning stimulus (CS) as well as reward inputs via*  
106 *substantia nigra pars compacta (SNc). The SNc forms a dopamine reward prediction error (RPE) signal,*  
107 *which governs plasticity of the connections from the PFC (DA LTP/LTD; green). The BG input structure,*  
108 *striatum, contains medium spiny neurons (MSNs), which cluster in 2 subtypes: D1 and D2 dopamine*  
109 *receptor-containing (direct and indirect pathways respectively). The rest of the nuclei are the globus*  
110 *pallidus external (GPe), subthalamic nucleus (STN), and the output structures: substantia nigra pars*  
111 *reticulata and globus pallidus internal (SNr/GPi). The loop is completed by connections from and to*  
112 *premotor cortices/thalamus (PMC/Thal). The two channels of the loop are colored purple/blue.*

113

114 We simulated the same standard two-choice IC and reversal task in three conditions:  
115 Healthy, Parkinsonian, and Huntington's BG. Fig. 1 presents a schematic diagram of nuclei and  
116 connections within the BG and their connections with cortices. The model is described in detail  
117 in Materials and Methods. The models received a stimulus (CS) that activates prefrontal cortical  
118 (PFC) neurons for all 500 trials. We say that the network chooses action 1 if the premotor  
119 cortical (PMC) neural group 1 displays greater activity than the PMC group 2. For reversal  
120 training, after action 1 is rewarded in trials 1 through 199, for trials 200 through 500, action 2  
121 was rewarded instead. We analyze and compare the learning and reversal performance in the  
122 three model states below.

123

#### 124 **Healthy BG facilitates learning of rewarded choices**

125 Fig. 2A shows choices made in the simulations: a higher activity of the PMC1 manifests  
126 choice 1 and vice versa. The graph shows the activity at the end of each trial, which is taken to  
127 be 750 msec long. On early trials, the choice is made randomly due to random initial conditions  
128 in the PMC network and mutual inhibition of PMC1 and PMC2. This reproduces the exploration  
129 phase, where the information about reward is collected (42,43). The modeled animal receives an  
130 unexpected reward every time it chooses action 1 (PMC1 on top). Within 20 trials, the system  
131 starts to consistently choose the rewarded action, and only a few exploratory deviations are made  
132 after that. On trial 200, we switch the simulated task to reversal: action 2 is rewarded instead.  
133 This quickly leads to reestablished exploratory behavior, and then locks the system to the  
134 rewarded choice, with occasional exploratory returns to choice 1. As explained below, our model  
135 allows for detailed analysis of the mechanism of this learning.

136

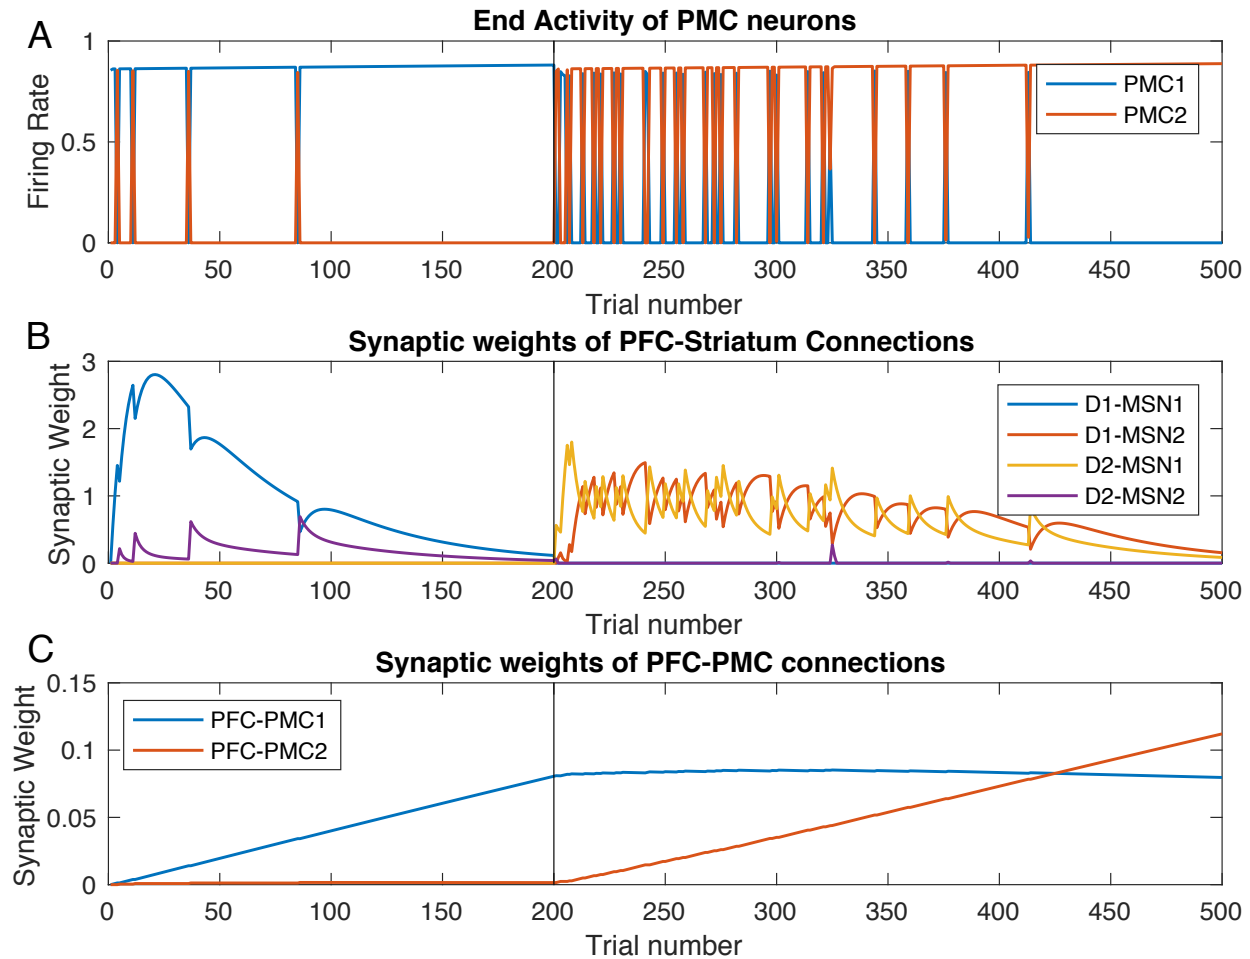

137

138 *Figure 2: Healthy BG facilitates learning of the initial task and reversal. Trial-by-trial dynamics of the PFC*

139 *activity and underlying modulation of synaptic weights in the Healthy BG model. Trials 1-199:initial*

140 *learning; trials 200-500: reversal (A) A higher activity of PMC1 (blue) manifests choice 1, whereas higher*

141 *activity of PMC2 manifests choice 2. (B) Synaptic weights of the PFC to striatum connections. (C) Synaptic*

142 *weights of the PFC to PMC connections.*

143

144 Two mechanisms facilitate learning of the rewarded choice – one fast and one slow. The

145 first mechanism is the potentiation of the PFC-to-striatum synaptic connections (Fig. 2B). The

146 unexpected reward creates a positive RPE encoded by SNc DA signaling and potentiates PFC

147 connections to all D1-MSNs (Fig. 2B). Note that the connections to D2-MSNs are potentiated



148 much later (see below). Importantly, whereas the DA signal itself is not selective for MSNs  
149 specific to the rewarded action, DA-mediated potentiation of PFC-MSN synapses is selective.  
150 What makes potentiation selective is the level of activation of the corresponding MSN: in the  
151 initial trials the reward is granted only if choice 1 is selected, that is when PMC1 activity is  
152 greater, and this happens only when the corresponding D1-MSN is active (due to static synaptic  
153 connections from PMC to MSNs specific for each choice). Since synaptic plasticity explicitly  
154 depends on the activity of the postsynaptic neuron, PFC-to-MSN1 connections are potentiated  
155 much more strongly than other MSN connections (Fig. 2B). This further selectively activates  
156 D1-MSNs. Thus, excitation of D1-MSNs neurons associated with choice 1 increases due to  
157 direct excitation from the PFC associated with the stimulus. The increased activity level of D1-  
158 MSNs inhibits downstream GPi1 neurons and, consequently, disinhibits the PMC1 neural group  
159 (Fig. 3).

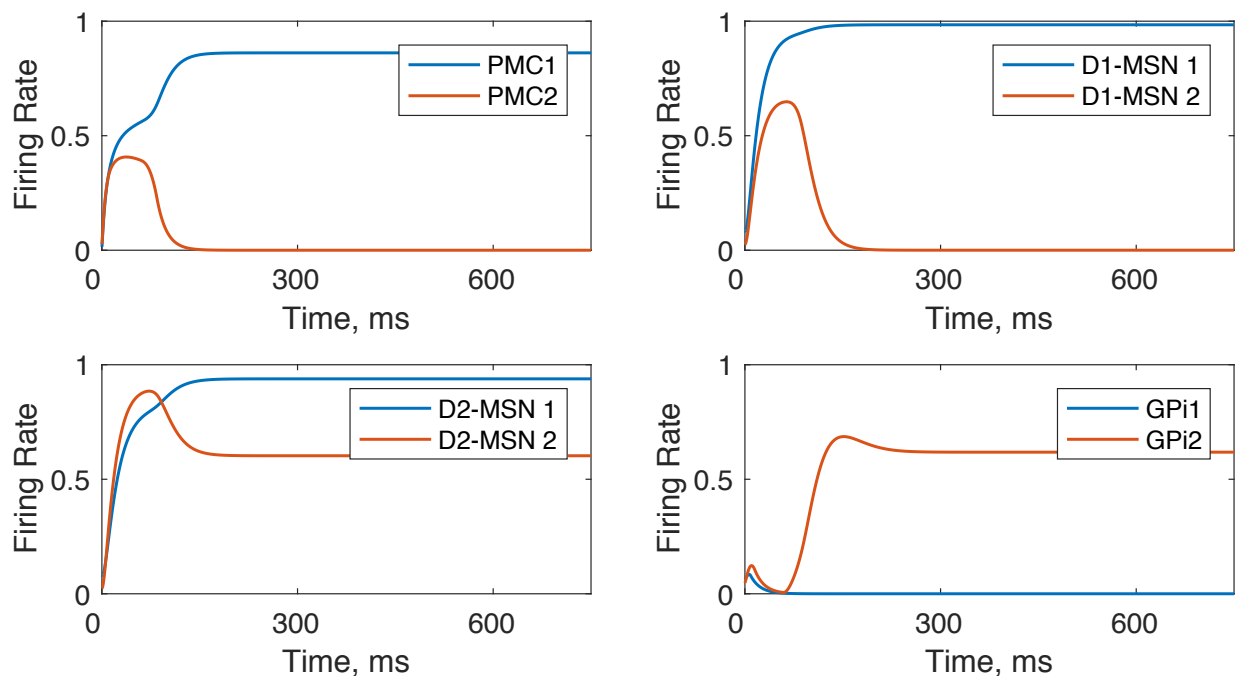

160  
161 *Figure 3: Within-trial dynamics of neural activity in the model with healthy BG. The network is biased*  
162 *towards option 1 as the PFC-D1-MSN1 and PFC-D2MSN2 connection weights are both set at 0.7, which*

163 *corresponds to a trial in late initial learning phase (~100). Activation of the D1-MSN1 group inhibits GPI1*  
164 *neurons, and thus disinhibits PMC1. GPI2 neurons remain excited and inhibit PMC2.*

165 The PFC to D2-MSN connections are potentiated much later in the process (Fig. 2B, purple) and  
166 further reinforce the activity of PMC1. The potentiation delay is because a negative RPE is  
167 required for activation of the D2 MSNs, which is formed after the expected reward builds up and  
168 a nonrewarded action is selected by chance. Then, every choice that is not followed by the  
169 expected reward activates the corresponding indirect pathway (i.e. D2-MSN2), which excites the  
170 downstream GPI2 neurons, and consequently inhibits the PMC2 activity (Fig. 3). This blocks the  
171 nonrewarded action and helps to lock the choice to the rewarded action. Co-activation of the two  
172 mechanisms is sufficient to lock the choice to the rewarded action.

173 During subsequent repetitions of the same trial, the PFC-MSN connection strength starts  
174 to decrease and approaches zero (Fig. 2B trials 80 to 200). However, the persistence of the  
175 rewarded choice remains intact (Fig. 2A). The mechanism for this is the growth of direct PFC-  
176 PMC1 connections (Fig. 2C) via classical reward-independent Hebbian synaptic plasticity: the  
177 two neural groups are co-active most of the time. This transition from PFC-MSN to PFC-PMC  
178 connections as a supporting mechanism for the rewarded choice occurs after the number of  
179 repetitions is in the order of a hundred (Fig. 2). Therefore, the model shows that direct cortico-  
180 cortical connections are responsible for the choice of the rewarded action after long training.

181 We next analyzed the behavior of the model when we began rewarding a choice different  
182 from the choice the model had been previously conditioned to make; this learning task is called  
183 reversal learning (44). Beginning at trial 200, we rewarded the model for selecting the other  
184 action (choice 2). Thus, starting at trial 200 the model mimics omission of a reward, which acts  
185 as an unexpected punishment (negative reward) for selecting action 1. This punishment

186 potentiates synaptic connections from the PFC to D2-MSNs associated with action 1 (D2-MSN1,  
187 Fig. 2B yellow), and, slightly later, to D1-MSNs associated with action 2 (D1-MSN2, Fig 2B  
188 red). This engagement of both direct and indirect pathways offsets the model bias for action 1  
189 and quickly sends the model into another exploratory phase. As Fig. 2A demonstrates, between  
190 trials 200 and 300 the model is randomly choosing between the two actions. It is important to  
191 note that, in accordance with others' findings (45,46), this second exploratory phase lasts longer  
192 than the initial exploratory phase. During reversal, the new potentiation of PFC-MSN  
193 connections is not enough to effectively overcome the bias for the initially learned choice and  
194 ensure choosing the newly rewarded option. The reversal exploratory phase ends only when the  
195 PFC-PMC2 connections become as strong as PFC-PMC1 and remove the bias (Fig. 2). Thus, the  
196 longer exploratory phase during reversal occurs because the model must first overcome its bias  
197 for the previously learned choice and then develop a new stimulus-choice 2 association.

198         The reversal mechanism relies more on the D2-MSN, indirect pathway and less on the  
199 D1-MSN, direct pathway than the initial learning. Due to the potentiated PFC-PMC1 connection,  
200 the system continues choosing option 1, even though it's not rewarded. This generates a negative  
201 reward prediction error (Fig. 4) and potentiates PFC connections to the D2-type neurons  
202 associated with action 1 (D2-MSN1; Fig. 2B yellow). The connection of PFC to D1-MSN2,  
203 which conducts the GO signal for the choice 2 lags by several trials (Fig. 2B, red), during which  
204 the exploratory phase begins and allows finding the new rewarded option. The connections to the  
205 D1 MSNs do not potentiate as strong during reversal as those during initial learning. Their  
206 temporal profile closely matches the positive RPE signal, which also stays significantly lower  
207 during reversal compared to the initial learning (Fig. 2B blue and red, Fig. 4 RPE). As a result,  
208 the reversal learning engages direct and indirect pathways at a comparable strength (Fig. 2B,

209 yellow and red), whereas during initial learning the direct pathway is engaged much stronger  
210 than the indirect (Fig. 2B, blue and purple).

211

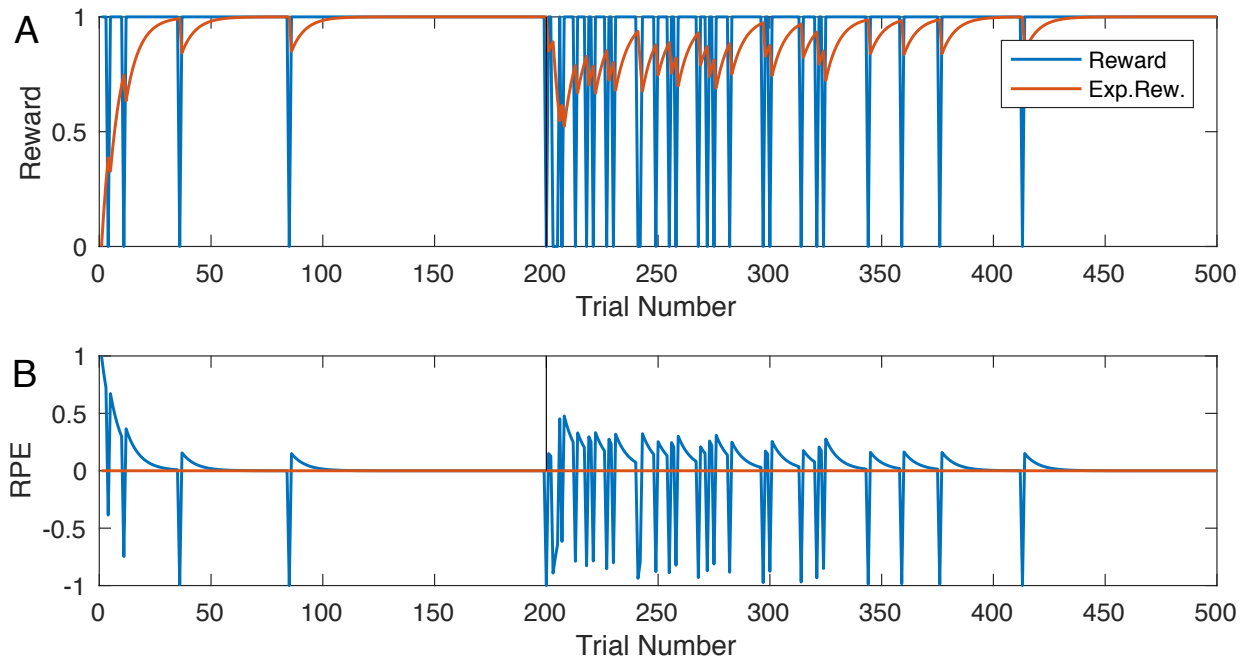

212

213 *Figure 4: Reward, expected reward (A), and the RPE (B) during initial learning and reversal trials in the*  
214 *model with healthy BG. As before, reversal starts at trial 200 (vertical black line). Note a greater RPE at*  
215 *the beginning of the initial learning compared to the reversal.*

216

### 217 **Mild Parkinsonian BG: impeded learning and spontaneous oscillations**

218 Our simulations (Fig. 5) show drastic difference in dynamics of the PMC neurons during  
219 initial learning and reversal in the model with mid-parkinsonian BG. During both phases,  
220 learning is severely impaired. First, the choice remains random for approximately the first 120  
221 trials. Second, the model does not reliably choose the rewarded option even after this period,  
222 although the rewarded option is chosen on a much greater number of trials (Fig. 5A blue above  
223 red in the initial learning and vice versa in the reversal). Third, the activity of the PMC neurons

224 is overall reduced compared to that in the model with healthy BG, and the trial-to-trial variations  
225 of this activity are drastically increased, even when only trials with the same choice are  
226 considered.  
227

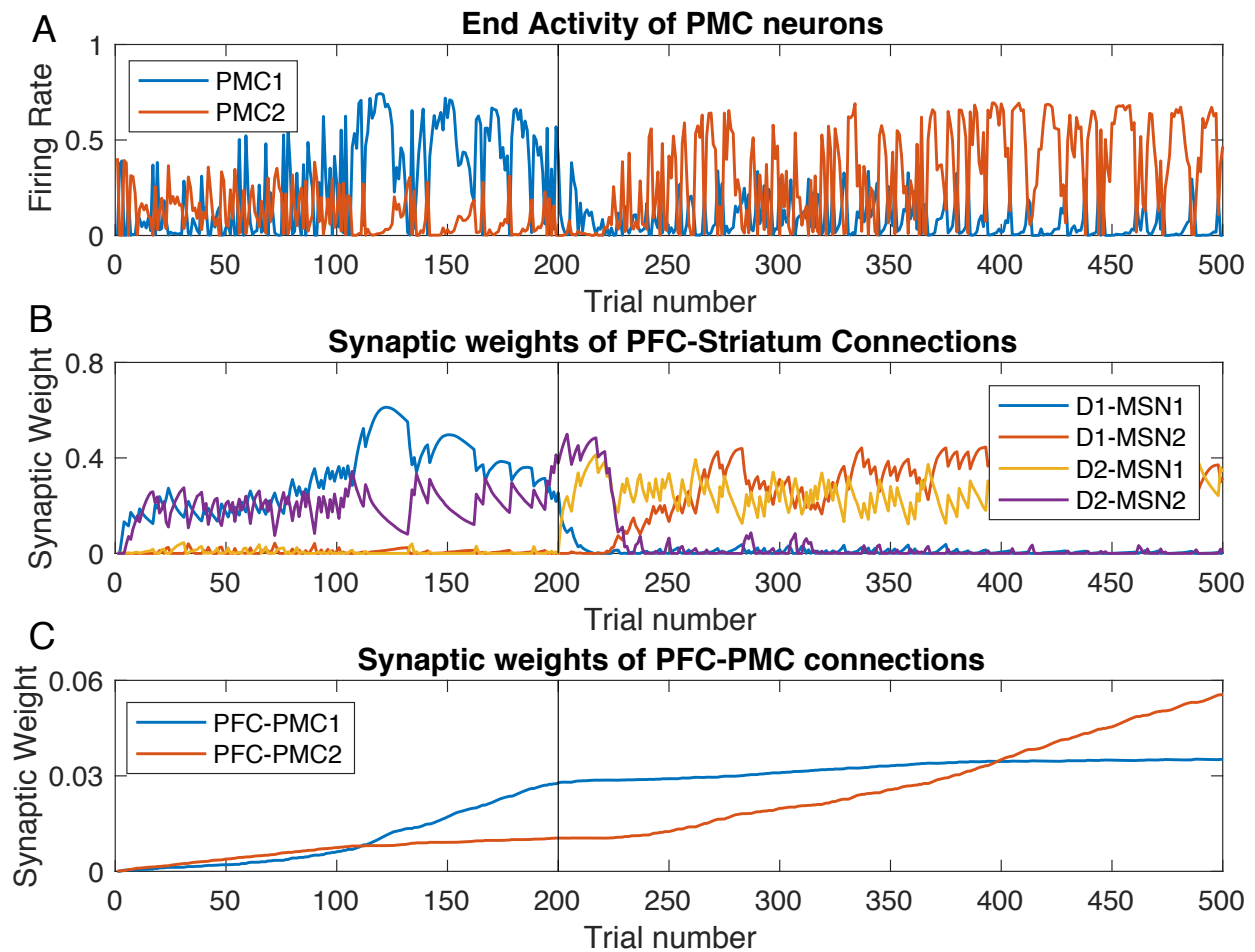

228  
229 *Figure 5: Decreased learning performance and increased variability of PMC activity in the model with*  
230 *mild-parkinsonian BG. Trial-by-trial dynamics of PMC activity (A) and underlying modulation of synaptic*  
231 *weights (B,C) in the model with mild-parkinsonian BG state. Notation is the same as in Fig. 2. Note the*  
232 *difference in scale in panels (B) and (C) compared to Fig. 2*

233

234           The underlying dynamic of the synaptic weights is also significantly altered. During  
235 initial learning, both direct pathway for choice 1 and indirect pathway for choice 2 are activated  
236 at a similar level (Fig. 5B), and this level is much lower than in the model with healthy BG (Fig.  
237 2B). The latter follows directly from the reduced SNC signaling (by 70%), which decreases the  
238 RPE and, thus, impedes potentiation of PFC-MSN connections. Since both PMC neural groups  
239 are active at a similar level, both connections from PFC are potentiated (Fig. 5C), and the system  
240 does not develop a preference for the rewarded choice. After trial 80, the rewarded choice starts  
241 to prevail as the PFC-PMC connections reflect the preference for choice 1. However, the PFC-  
242 PMC1 connection does not achieve the level reached in the model with healthy BG (Fig. 2C)  
243 within the 200 trials designated for initial learning. Hence, exploration between the choices  
244 persists for all 200 trials, and the prevalence of the rewarded choice requires the persistent  
245 activation of PFC-MSN connections. Therefore, the model with mild parkinsonian BG is capable  
246 of learning the choices, but the effective learning rate is much lower.

247           The low levels of PFC-PMC connections persist into the reversal phase too and never  
248 reach the levels shown by the model with healthy BG even though plasticity rules of the PFC-  
249 PMC connections remain the same in both models. Therefore, our modeling predicts that the  
250 mild-parkinsonian BG does not allow for the proper potentiation of the PFC-PMC connections,  
251 and this leads to impaired learning. Interestingly, the reversal phase starts with activation of both  
252 indirect pathways simultaneously (Fig. 5B, purple and yellow). This suppresses the activity of  
253 both PMC neural groups, blocks any choice and blocks changes in the PFC-PMC synaptic  
254 weights. Only after some 40 trials, the NO-GO signal for choice 2 is replaced by a GO (Fig. 5  
255 purple and red). Thus, the model with mild-parkinsonian BG predicts that the exploratory phase

256 at the beginning of the reversal learning is replaced by blockade of any choice, and this further  
257 impedes learning.

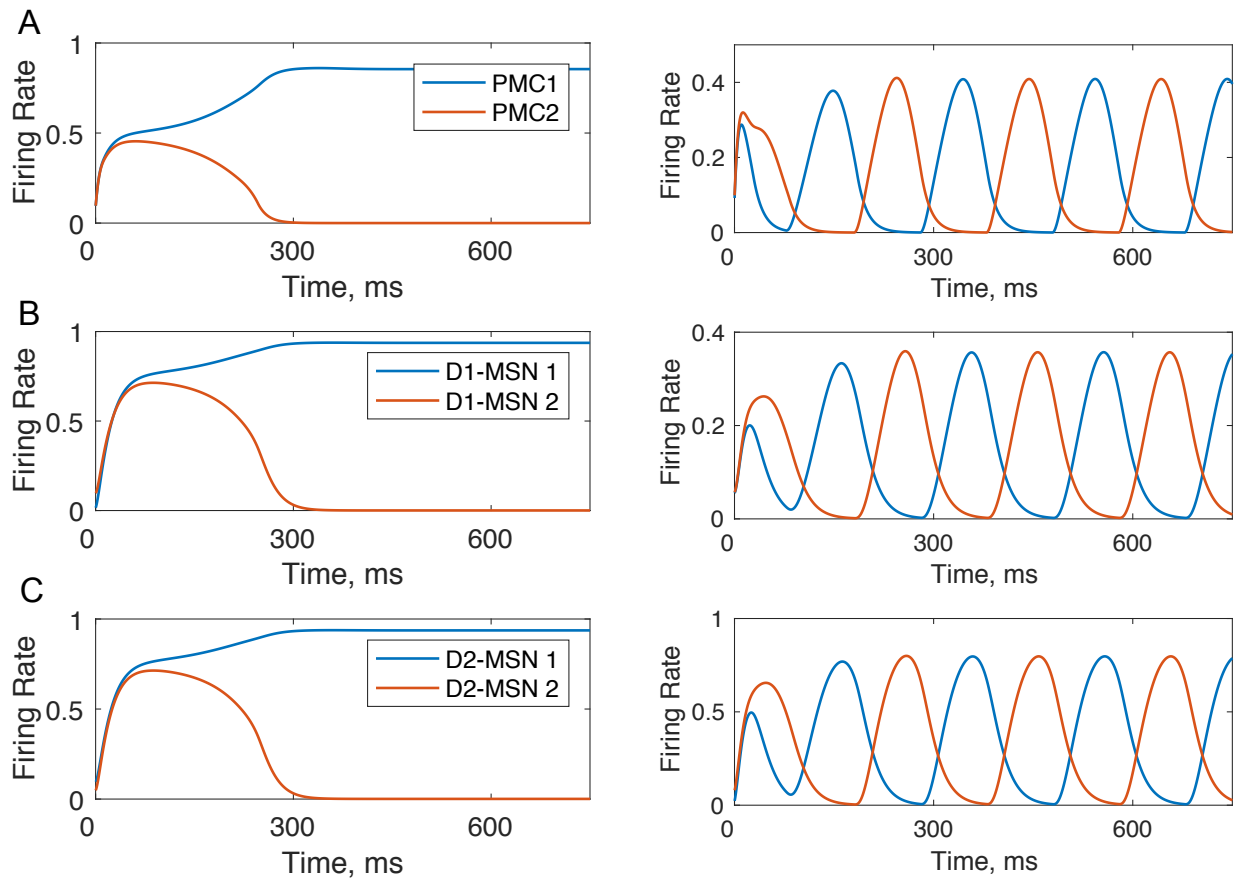

258  
259 *Figure 6: Within-trial dynamics of neural activity in the model with healthy (left) and parkinsonian (right)*  
260 *BG. Panels A, B, and C show firing rates for PMC, D1 MSNs and D2 MSNs respectively. In the healthy case,*  
261 *the firing rates equilibrate within 500 ms. In the parkinsonian case, oscillations in the firing rate emerge*  
262 *and persist. All plastic synaptic connections are set to zero to simulate the state of no bias towards any*  
263 *choice.*

264 Perhaps the most interesting change in the model with parkinsonian BG is the drastic  
265 increase in the trial-to-trial variability of the PMC neurons (Fig. 5A). To explain the mechanism  
266 of this variability, we considered within-trial dynamics of activity for all neural groups in the  
267 model. Fig. 6 shows these dynamics for the PMC neurons and MSNs in the healthy vs.

268 parkinsonian BG models. In the healthy case activity levels come to an equilibrium, while in the  
269 parkinsonian case, they engage in persistent oscillations. The anti-phase for the oscillations in the  
270 neural groups corresponding to the choice 1 and 2 is due to mutual competition (inhibition)  
271 between PMC1 and PMC2 groups. The oscillations arise from the negative feedback loop that  
272 the BG, and in particular its indirect pathway, provides for the activity of each PMC neural  
273 group. Indeed, the static PMC to D2 MSN connections, which constitute this negative feedback,  
274 are stronger in the parkinsonian case ( $w_{PMC-D2}$ , in Table 2). The period of these oscillations is  
275 approximately 210 ms, which is 4.7 Hz. No potentiation in the PFC-PMC and PFC-MSN  
276 connections within the ranges in Fig. 5 B and C suppress the oscillations (data not shown).  
277 Therefore, the simulations predict that the trial-to-trial variability of the PMC neurons in the  
278 model with parkinsonian BG is caused by robust within-trial oscillations in the activity of all  
279 neuron groups in the model.

280         In order to model the impact of BG DBS or surgical interventions on performance and  
281 learning in PD, we performed additional simulations of the PD model in which the BG signal to  
282 PMC was ablated from trial 150 till the end (Fig. 7). In this period, the variability of the PMC  
283 activity vanishes completely. Furthermore, the PFC-striatal connections no longer exert any  
284 influence on the choices, but the PFC-PMC connections are strong enough to lock the choice to  
285 the rewarded option, and the cortical connections increase further at a greater rate. After the  
286 reversal on trial 200, however, the changed values of the choices remain unnoticed by the  
287 system, the choice remains locked on the now unrewarded option, and the cortical connections  
288 supporting this choice keep rising. In this state, behavior improves, but learning is impaired.



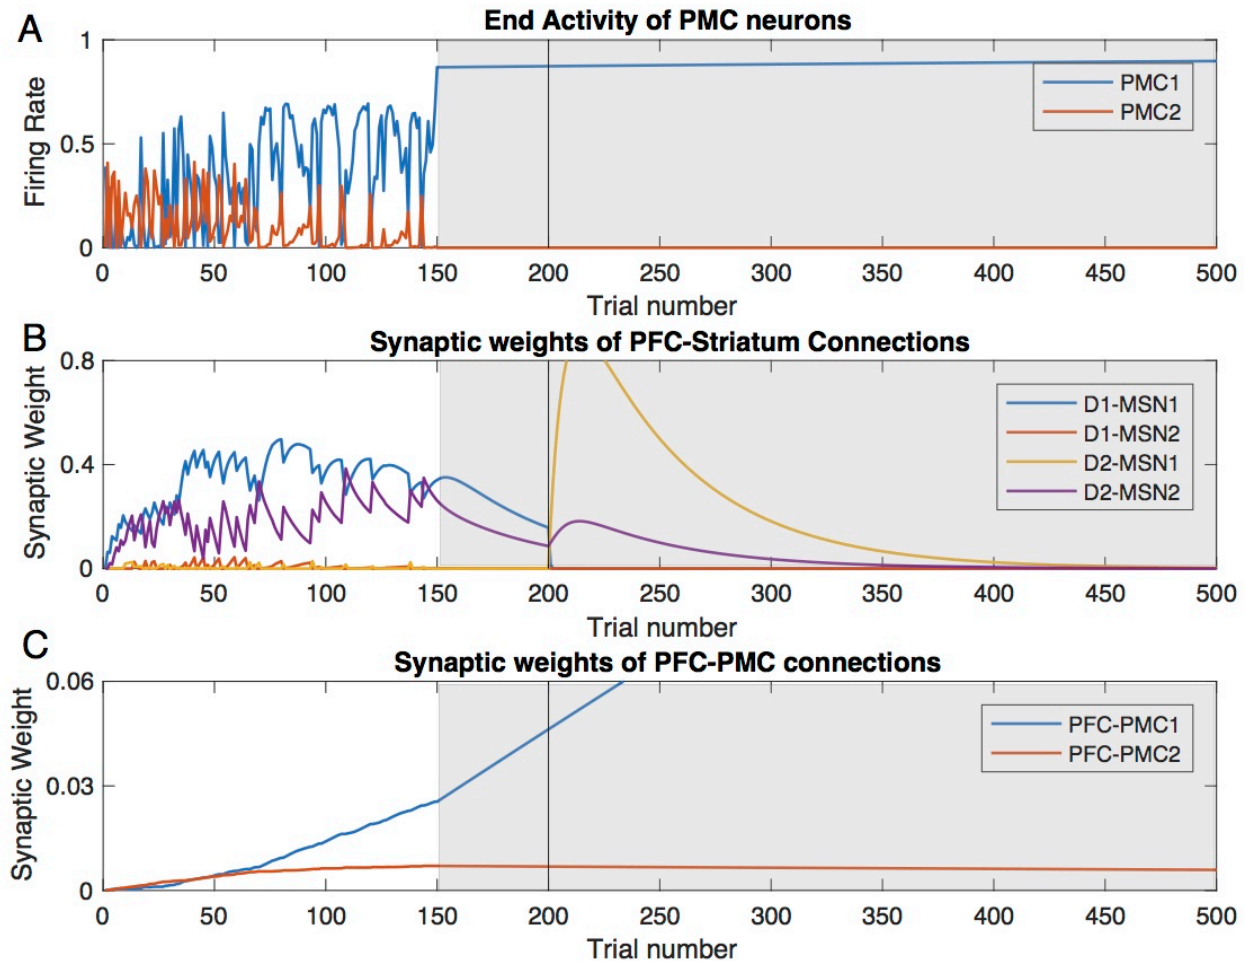

289

290 *Figure 7: In the PD state model, the variability of PMC activity and switching between choice 1 and 2*  
 291 *cease at the DBS onset. Trial-by-trial dynamics of the PMC activity and underlying modulation of synaptic*  
 292 *weights in the PD BG model with simulated DBS starting at trial 150. Same notation as in Fig. 2. (A) The*  
 293 *levels of PMC1 and PMC2 activity (choice 1 vs. 2) at the end of each trial (B) Synaptic weights of the PFC*  
 294 *to striatum connections reflect rewarded choices. (C) Synaptic weight of the PFC to PMC1 connection*  
 295 *keep growing after DBS onset, and during reversal.*

296

## 297 **Grade 2 Huntington's Disease BG state: persistent exploratory behavior**

298 If the above case of Parkinson's disease is associated with strengthening the indirect  
 299 pathway, in the case of Huntington's disease the connections in the indirect pathway become

300 weaker (Table 3). The major difference with the healthy BG model is that the trial-to-trial  
301 dynamics of the PMC neural groups looks like the exploratory phase never ends (Fig. 8A). At the  
302 same time, we see from the synaptic weights (Fig. 8B and C) that choice-reward contingencies  
303 are learned almost as effectively as in the healthy case (Fig. 2), although the synaptic weights are  
304 somewhat lower. The differences are the activation of the indirect pathway for choice 2 lingering  
305 at the beginning of the reversal phase (Fig. 8B purple) and the persistence of the PFC-MSN  
306 connections similar to the parkinsonian case. The latter, however, is not a cause but rather a  
307 consequences of the continuous exploratory choices that bring no reward. Therefore, despite the  
308 efficacious learning (Fig. 8C), choice behavior is impaired relative to control (Fig. 8A).

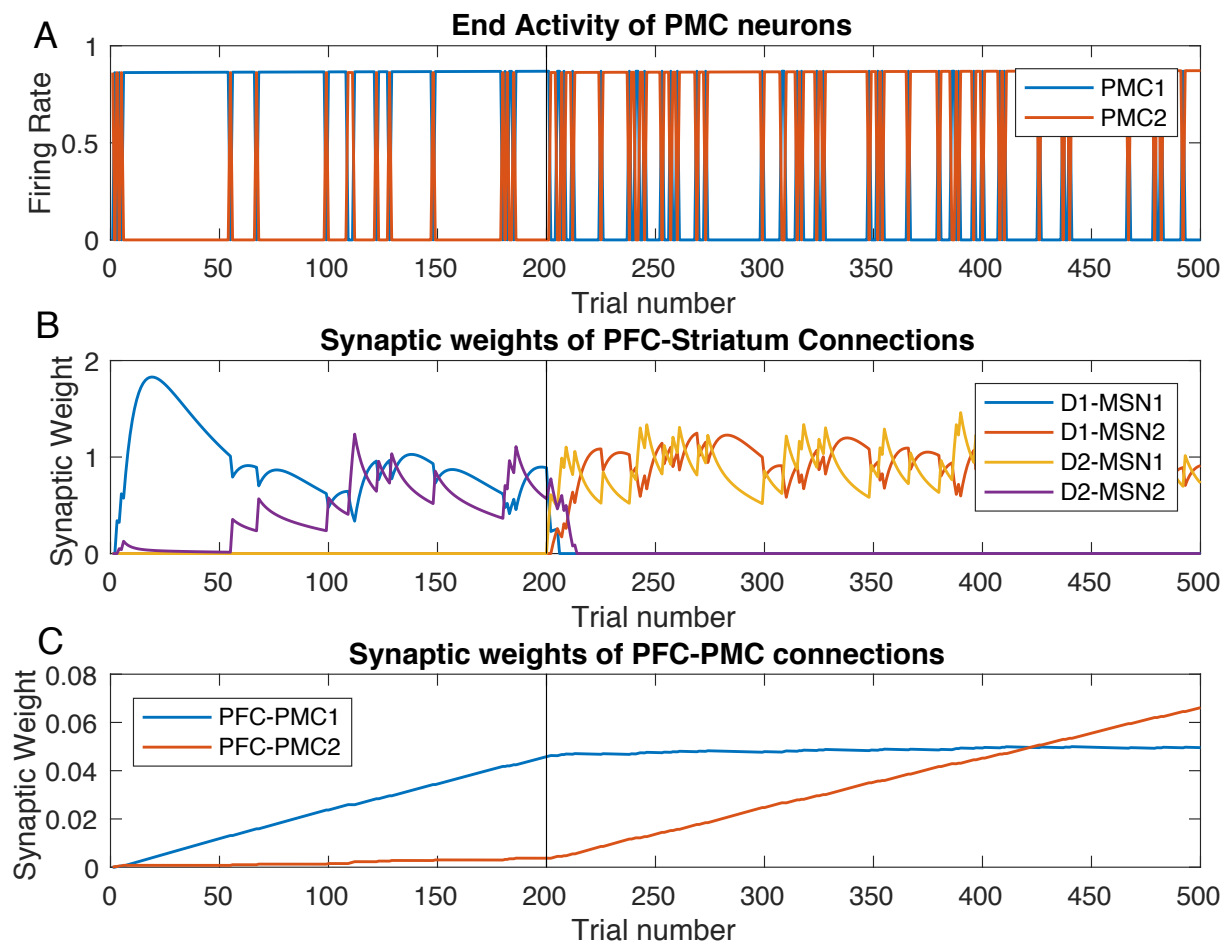

309

310 *Figure 8: Random switches between rewarded and unrewarded options persist in the model with*  
311 *Huntington state BG. Trial-to-trial dynamics of PFC neural activity (A) and underlying dynamics of*  
312 *synaptic weights (B,C). The notation is the same as in Fig. 2.*

313

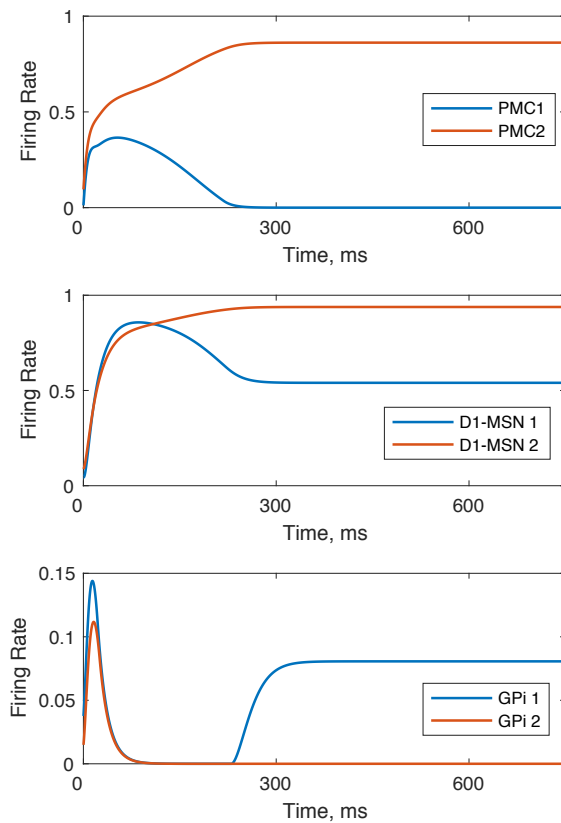

314

315 *Figure 9: Occasional choice of the nonrewarded option made in the model with Huntington state BG.*  
316 *Within-trial dynamics of PMC, D1 MSN, and GPI neural activity is shown. The greater activity of PMC2*  
317 *groups signifies that the action 2 is chosen, even though choice 1 is made preferable in the model by*  
318 *potentiating PFC-PMC1, PFC-D1 MSN1 and PFC-D2 MSN2 connections:  $W_{PFC1-PMC1} = 0.04$ ,*

319  *$W_{PFC1-D1MSN1} = 1$ ,  $W_{PFC1-D2MSN2} = 1$*

320

321           The cause for the persistent exploratory phase is the positive PMC-BG feedback loop  
322 through D1 MSNs, which is not balanced by the D2 MSN pathway. Indeed, an occasional  
323 increase in the activity of the PMC2 neural group, which represents a non-rewarded action,  
324 excites the corresponding D1 MSN group, and through disinhibition by GPi2 activity, further  
325 increases the PMC2 activity (Fig. 9). The reduced connectivity in the D2 MSN pathway makes  
326 the STN neural activity the same for choices 1 and 2 (data not shown) and excludes the indirect  
327 pathway from the competition between the choices. This leads to occasional choices of the non-  
328 rewarded option, and our simulations show that this behavior is robust with respect to growing  
329 PFC-PMC and PFC-MSN connections (Fig. 8). Therefore, the lack of balance between direct and  
330 indirect pathways in the model of Huntington's disease causes persistent random switching from  
331 rewarded to non-rewarded choice after both initial learning and reversal.

332           In order to model the impact of BG DBS or surgical interventions on performance and  
333 learning in HD, we also performed additional simulations of the HD model in which the BG  
334 signal to PMC was ablated from trial 100 till the end (Fig. 10). The random switches between the  
335 choices cease shortly after, but not at the onset of DBS. The response to DBS is very similar to  
336 that in the PD case (Fig. 7). In this period, the PFC-striatal connections no longer exert any  
337 influence on the choices, but the PFC-PMC connections are strong enough to lock the choice to  
338 the rewarded option. After the reversal on trial 200, however, the changed values of the choices  
339 remain unnoticed by the system, the choice remains locked on the now unrewarded option, and  
340 the cortical connections supporting this choice keep rising. Therefore, during DBS, or after  
341 surgical interventions ablating BG output, behavior improves, but learning is impaired in HD as  
342 well as in the PD state.

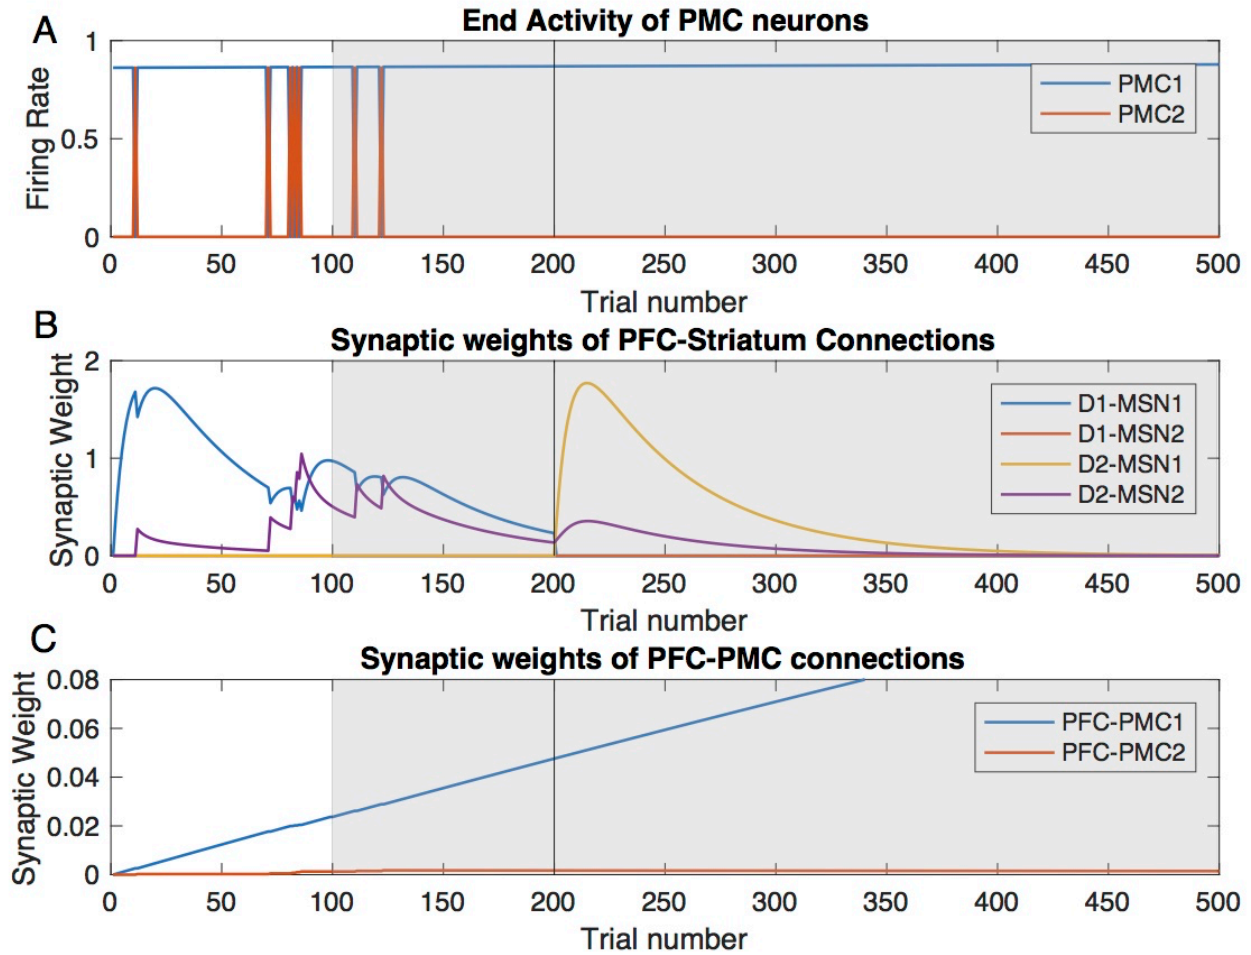

343

344 *Figure 10: In the HD state, the random switches between choice 1 and 2 cease shortly after, but not at*  
345 *the DBS onset. Trial-by-trial dynamics of the PMC activity and underlying modulation of synaptic weights*  
346 *in the Huntington BG model with simulated DBS starting at trial 100. Same notation as in Fig. 2. (A) The*  
347 *levels of PMC1 and PMC2 activity (choice 1 vs. 2) at the end of each trial (B) Synaptic weights of the PFC*  
348 *to striatum connections reflect rewarded choices. (C) Synaptic weight of the PFC to PMC1 connection*  
349 *keep growing after DBS onset, and during reversal.*

350

351 **Discussion**

352 Our model implements the cortico-BG-thalamo-cortical loop function in a standard 2-choice  
353 instrumental conditioning task. We have shown that potentiation of corticostriatal synapses  
354 enables learning of rewarded options. However, later these synapses become redundant as direct  
355 connections between prefrontal and premotor cortices (PFC-PMC) potentiate by Hebbian  
356 learning. The model shows that disease-related imbalances of the direct and indirect pathways in  
357 the BG impairs learning and suggests that these imbalances may also impede choices that have  
358 been learned previously, in spite of BG redundancy for those choices.

359 Our model of the parkinsonian state reproduces several major behavioral and  
360 electrophysiological features documented experimentally: First, initial learning is much slower,  
361 but reversal takes about as many trials in the mild PD state as it does in the healthy state (~100  
362 trials). As initial learning is associated with an unpredicted reward (positive RPE) and reversal  
363 with reward omission (negative RPE), which is similar to punishment, this is consistent with  
364 experimental findings, in which reward, but not punishment learning is impeded in PD patients  
365 (47,48). Second, the overall PMC activity is diminished in the PD state, consistent with PD  
366 studies (49). Further, the model predicts that this activity is lowest at the beginning of the initial  
367 learning and reversal due to aberrant engagement of the indirect pathway, which can be  
368 displayed as stronger bradykinesia. Third, the model shows robust oscillations in the activity of  
369 the cortico-BG-thalamo-cortical loop in the PD state. The oscillations are generated by a  
370 negative feedback branch of the loop through the indirect pathway as suggested before (50,51).  
371 The frequency of these oscillations is about 5 Hz, which is in the theta band. An increase in the  
372 EEG theta band is a marker of PD-related cognitive decline (52,53). Our simulations show that

373 the oscillations cause multiple choice errors and, consequently, impede task performance and  
374 learning.

375 In the HD state, our model displays persistent randomly occurring choices of the  
376 unrewarded option, especially frequent after the reversal. This would register as impaired  
377 learning in behavioral tests, which is consistent with experimental results for cognitive (54,55)  
378 and motor tasks (56,57) in HD patients in the early stages of the disease. Furthermore, the model  
379 suggests that performance for previously learned tasks is also affected.

380 Therefore, our model reproduces impairments of the previously learned actions  
381 documented in BG-affecting diseases like PD and HD as well as after certain BG lesions  
382 (8,32,58). However, surgical and deep brain stimulation (DBS) interventions in PD and HD  
383 patients do not impair, but rather restore motor function (33–35,59). This raises the question:  
384 how can these two lines of evidence therefore be reconciled?

385 Learning in the model consists of two phases: BG-based and cortex-based. In a faster  
386 BG-based phase, the connections from PFC to MSNs are potentiated according to the RPE  
387 signal. The BG output inhibits choices with negative RPE and disinhibits those with positive  
388 RPE. Once the behavior is learned, the RPE becomes zero, and the PFC-MSN connections decay  
389 to zero. The future choices are supported by the slower cortex-based learning phase: The  
390 connections from PFC directly to PMC are potentiated based on the Hebbian mechanism. Our  
391 simulations show that, even after the cortico-cortical connections increase to the levels ensuring  
392 robust choice of the rewarded option in the healthy state, both of the disease models are unable to  
393 make robust choices. Thus, behaviors that no longer need the BG are impaired. The model shows  
394 that it is an abnormal BG output that impairs the choices. Indeed, the BG output to the PMC does  
395 not vanish even when the behavior is learned and the BG no longer receives any RPE signal. In

396 this case, due to the inputs from the PMC, the healthy BG disinhibits the previously learned  
397 choice, i.e. it conforms with the PFC-PMC associations. This disinhibitory function is impaired  
398 in both PD and HD, as well as after striatal lesions (8,32,58). According to this prediction,  
399 disruption of the BG output by GPi lesions or DBS, which was successfully used in PD (33–35)  
400 and tested in HD patients (59), would improve performance on previously learned tasks. Indeed,  
401 our model of a lesion of BG output demonstrates strengthening of performance on previously  
402 learned choices. Therefore our model reconciles how specific GPi lesions or DBS that abolish  
403 BG output, restore previously learned behaviors that were lost due to disrupted BG function,  
404 however this comes at the expense of decreased cognitive flexibility.

405         Altogether, we have modeled the function of the cortico-BG-thalamo-cortical loop in a 2  
406 choice instrumental conditioning task and shown the mechanism by which this function is  
407 disrupted in HD and PD conditions. Further, we have shown how DBS or GPi lesions restore  
408 previously learned choices, but completely disrupts learning of new behavior. Our results  
409 reconcile the apparent contradiction between the critical involvement of the BG in execution of  
410 previously learned actions and yet no impairment of these actions after BG output is ablated by  
411 lesions or DBS.  
412



## 413 **Materials and Methods**

414 We adopt rate model formalism extensively used to reproduce activity and function of numerous  
415 brain structures (60). In particular, we follow a validated model of motor control (38) and modify  
416 it for action selection.

417

### 418 **Structure of the basal ganglia**

419 Fig. 1 presents a schematic diagram of nuclei and connections within the BG and their  
420 connections with cortices. The cortico-BG-thalamo-cortical loop is separated into channels  
421 selective for each of the two actions of the model (see below). First, the striatum, the primary  
422 input structure of the BG, receives excitatory inputs from the prefrontal cortex (PFC) and  
423 premotor cortex (PMC) in the cerebrum as well as the thalamus. From the striatum, two  
424 competing pathways are activated: a direct pathway (striatum-SNr/GPi) and an indirect pathway  
425 (striatum-GPe-STN-SNr/GPi). These two pathways converge at the BG output nuclei, the SNr  
426 and GPi, and serve to modulate their activities. In the model SNr and GPi activity are treated as  
427 one unit. SNr/GPi activity inhibits a corresponding neural group in the thalamus and PMC and  
428 blocks the corresponding action. In the model thalamus and PMC activity is treated as a single  
429 unit (PMC/Thal). To execute the action, SNr/GPi activity must decrease and disinhibit the  
430 PMC/Thal neurons. In addition, DA neurons in the SNc signal a reward prediction error (RPE),  
431 which change synaptic weights of PFC-striatum connections via DA-dependent long-term  
432 synaptic potentiation (LTP) and long-term synaptic depression (LTD) to allow for reward-based  
433 learning.

434

### 435 **Behavioral task**

436 Our model implements a standard design for intertemporal choice tasks (32). The  
437 circuitry shown in Fig. 1 is built to reproduce selection between two actions, one of which is  
438 rewarded. A typical task is to learn that, for instance, action 1 is rewarded if a conditioning  
439 stimulus (CS) is presented. Then, this task is “reversed”: after learning this contingency, the  
440 reward following the same CS is shifted to action 2. Thus, the cortico-BG-thalamo-cortical loop  
441 has 2 channels: for choice 1 and 2, except for the PFC that represents the CS and the SNc that  
442 represents the unexpected reward. Activation of neural groups 1 and 2 in the PMC/thalamus  
443 correspond to execution of action 1 and 2 respectively. Thus, in the model, an action is  
444 considered selected if the activity level of the corresponding PMC neural group at the end of a  
445 simulated trial is higher than that of the other group. The behavioral readout is if the stimulus-  
446 reward contingencies can be learned, and how many trials learning takes.

447

#### 448 **Firing rate equations**

449 The activity of every neuron (except the dopaminergic neurons in the SNc) is governed  
450 by the following differential equation (38):

$$\tau \frac{dA}{dt} = \sigma(I) - A \quad (1)$$

451 where  $A$  is the instantaneous activity level of the neuron. Here,  $\tau$  is a time constant taken to  
452 equal 15 msec based on previous models and experimental studies (61).  $I$  is the synaptic input to  
453 the neuron. The expressions for synaptic input to each neuron group, and the formula are  
454 compiled in Table 1.  $\sigma(I)$  is a normalized response function defined as:

$$\sigma(I) = \begin{cases} 0, & \text{if } I \leq 0 \\ \tanh(I), & \text{if } I > 0 \end{cases} \quad (2)$$

455 We have adapted the following notation:  $X_m$  to denote the activity (firing rate) of neural  
 456 group X in the pathway for the  $m^{\text{th}}$  action. Since our model contains only two actions, the only  
 457 possible values for  $m$  are 1 and 2. The index  $n$  in the formula for  $X_m$  refers to the other of the  
 458 two channels, e.g.  $n = \begin{cases} 1, & \text{if } m = 2 \\ 2, & \text{if } m = 1 \end{cases}$ . Further,  $w_{X_Y}$  denotes the synaptic weight (strength of  
 459 connection) from group X to group Y and  $dr_X$  denotes a tonic drive to group X. Many of these  
 460 weights are assumed constant throughout our trials, but several of them are plastic as described  
 461 below.

462 Table 1: Synaptic inputs

| Neuron | Formula for Synaptic Input                                                          |
|--------|-------------------------------------------------------------------------------------|
| PFC    | $I_{PFC} = input\_pfc$                                                              |
| D1 MSN | $I_{D1\ MSN_m} = w_{PFC-D1}PFC + w_{PMC-D1}PMC_m$                                   |
| D2 MSN | $I_{D2\ MSN_m} = w_{PFC-D2}PFC + w_{PMC-D2}PMC_m$                                   |
| GPe    | $I_{GPe_m} = dr_{GPe} - w_{D2-GPe}D2\ MSN_m$                                        |
| STN    | $I_{STN_m} = dr_{STN} - w_{GPe-STN}GPe_m$                                           |
| GPi    | $I_{GPi_m} = dr_{GPi} - w_{D1-GPi}D1\ MSN_m + w_{STN-GPi}STN_m$                     |
| PMC    | $I_{PMC_m} = dr_{PMC} + w_{PFC-PMC_m}PFC - w_{GPi-PMC}GPi_m - w_{PMC_n-PMC_m}PMC_m$ |

463

#### 464 **Synaptic plasticity**

465 The synaptic weights from PFC to PMC neurons and from PFC to MSNs are plastic,  
 466 which means that they change depending on the activity of these nuclei and behavioral outcome  
 467 (reward received) respectively (40,41,39). In simulations, the synaptic weights are updated at the  
 468 beginning of every trial depending on the behavior of the model in previous trials. Before we

469 discuss the specific mechanisms by which we updated these plastic synaptic weights, we will  
470 first discuss how we calculated the activity of the dopaminergic neurons in the SNc, which  
471 essentially mediate reward-based learning.

472 The activity of the SNc neurons is associated with a reward prediction error (RPE) (62).  
473 Following previous models (e.g. (38)), we assume that the activity of the SNc neural group  
474 reflects the difference between the expected reward and the actual reward:

$$SNc = R - R_j^e \quad (3)$$

475 where  $R$  is the actual reward given based on the action selected, and  $R_j^e$  is the expected reward at  
476 the  $j^{\text{th}}$  trial. The expected reward on the first trial,  $R_1^e$ , is equal to 0 and is then subsequently  
477 updated according to the following scheme:

$$R_{j+1}^e = \alpha R_j + (1 - \alpha)R_j^e \quad (4)$$

478 where  $\alpha$  is a constant (set equal to 0.15) and  $R_j$  denotes the actual reward received by the model  
479 on the  $j^{\text{th}}$  trial.

480 The actual reward received in simulations,  $R$ , is determined by the following:

$$481 \quad R = \begin{cases} 1, & \text{if rewarded action performed} \\ 0, & \text{if rewarded action not performed} \end{cases}$$

482 where we determined which action is selected by comparing the activities of the PMC neurons at  
483 the end of each trial as described above.

484 Altogether, after each trial, the PFC-striatal synaptic connections are updated according  
485 to the following rules:

$$\Delta w_{PFC-D1m} = \lambda * SNc * PFC * D1_m - d * w_{PFC-D1m} \quad (5)$$

$$\Delta w_{PFC-D2m} = -\lambda * SNc * PFC * D2_m - d * w_{PFC-D2m} \quad (6)$$

486 where  $\lambda$  is a learning rate constant and  $d$  is the decay rate constant. Here,  $PFC$ ,  $D1_m$ , and  $D2_m$   
487 denote the activity of the respective neural group at the end of the trial ( $m = 1,2$ ).

488           Lastly, we describe the mechanism by which we updated the connections between the  
489 PFC and PMC neurons. Here, we let  $w_{PFC-PMC_m}$  denote the synaptic weight of the connection  
490 between the PFC neural group and the  $m^{\text{th}}$  PMC neural group. After each trial, the synaptic  
491 weights are updated according to the following Hebbian Learning Rule:

$$\Delta w_{PFC-PMC_m} = \lambda_{CM} * PFC * PMC_m - d_{CM} * w_{PFC-PMC_m} \quad (7)$$

492 where  $\lambda_{CM}$  is the learning rate and  $d_{CM}$  is the decay rate of the cortical connections. Here,  $PFC$   
493 and  $PMC_m$  denote the activity of the PFC neurons and  $m^{\text{th}}$  PMC neuron group at the end of the  
494 trial.

495           Now, we will outline our methodologies for calibrating our three different BG model  
496 states: healthy, Parkinsonian, and Huntington's disease.

497

#### 498 **Healthy BG state**

499           We target to reproduce rodent behavior in instrumental conditioning (IC) tasks (32).  
500 Thus, an animal will learn contingencies between a conditioning signal and a rewarded action—  
501 pressing one of two levers. We reduce the model by (38) and focus our model on the interaction  
502 of the thalamocortical and BG networks (Fig. 1) and reproduce the function of the cortico-BG-  
503 thalamo-cortical loop in the above two-choice task. The parameter values are shown in Table 1.  
504 The values were taken from previous studies (38) with a few minor modifications that allow for  
505 both robust instrumental conditioning as well as reversal learning.

506

#### 507 **Parkinsonian BG state**

508           To create disease models from our healthy BG model, we reviewed physiological data.  
509 The neuropathology of Parkinson's Disease (PD) is incredibly well-understood: it begins with

510 the destruction of the dopaminergic neurons in the SNc (63,64). Further, the disease is  
511 accompanied by a decreased firing rate of the D1 MSNs (65,66), GPe (67–69), and PMC (70) as  
512 well as increased firing rates in the D2 MSNs (65,66), STN (71,72), and GPi (73,67,74). We  
513 induced an in silico mild Parkinsonian state in our model by suppressing SNc output by 70% and  
514 changing synaptic weights along with tonic drives (49,64) as outlined in Table 2.

515

### 516 **Huntington's BG state**

517 The pathology of Huntington's Disease (HD) is less well-understood; however, it is clear  
518 that there is a progression of the disease from chorea (involuntary, jerky movement) at its onset  
519 to akinesia (loss of the power of voluntary movement) at its conclusion (75). We modeled the  
520 chorea phase (Grade 2 HD) by weakening the D2 MSN-GPe connection by 90%, weakening the  
521 GPe-STN connection by 40%, and decreasing the PFC input to account for destruction of the  
522 PFC (75,76). These percentages are gathered from the physiological observations of Reiner et al.  
523 (75). The resulting parameters are shown in Table 3.

524

### 525 **Numerical Simulations**

526 Our model was coded in MATLAB. We considered a trial to last 750 msec, and at the  
527 end we register the activity of each neuron in the circuit. We chose to cutoff trials at this point  
528 because it was sufficient to guarantee that the neural activity converges to a steady state. An  
529 exception is a case when neural activity does not approach a steady state and remains oscillatory,  
530 which we also found in this study. We update strengths for the plastic synapses after each trial.  
531 Finally, we reset the initial activity of the neurons to be at randomized levels at the beginning of  
532 each subsequent trial. We ran simulations consisting of 500 such trials.

533 **References**

- 534 1. Redgrave P, Prescott TJ, Gurney K. The basal ganglia: a vertebrate solution to the selection  
535 problem? *Neuroscience*. 1999 Apr;89(4):1009–23.
- 536 2. Nelson AB, Kreitzer AC. Reassessing models of basal ganglia function and dysfunction.  
537 *Annu Rev Neurosci*. 2014;37:117–35.
- 538 3. Bhatia KP, Marsden CD. The behavioural and motor consequences of focal lesions of the  
539 basal ganglia in man. *Brain*. 1994;117(4):859–76.
- 540 4. DeLong MR. Primate models of movement disorders of basal ganglia origin. *Trends*  
541 *Neurosci*. 1990 Jul;13(7):281–5.
- 542 5. Denny-Brown. The basal ganglia and their relation to disorders of movement. *Br J Surg*.  
543 1962 Jul;50(219):117–8.
- 544 6. Aron AR, Durston S, Eagle DM, Logan GD, Stinear CM, Stuphorn V. Converging  
545 Evidence for a Fronto-Basal-Ganglia Network for Inhibitory Control of Action and  
546 Cognition. *J Neurosci*. 2007 Oct 31;27(44):11860–4.
- 547 7. Draganski B, Kherif F, Klöppel S, Cook PA, Alexander DC, Parker GJM, et al. Evidence  
548 for segregated and integrative connectivity patterns in the human Basal Ganglia. *J Neurosci*  
549 *Off J Soc Neurosci*. 2008 Jul 9;28(28):7143–52.
- 550 8. Redgrave P, Rodriguez M, Smith Y, Rodriguez-Oroz MC, Lehericy S, Bergman H, et al.  
551 Goal-directed and habitual control in the basal ganglia: implications for Parkinson’s  
552 disease. *Nat Rev Neurosci*. 2010 Nov;11(11):760–72.

- 553 9. Packard MG, Knowlton BJ. Learning and Memory Functions of the Basal Ganglia. *Annu*  
554 *Rev Neurosci.* 2002 Mar;25(1):563–93.
- 555 10. Foerde K, Shohamy D. The role of the basal ganglia in learning and memory: insight from  
556 Parkinson’s disease. *Neurobiol Learn Mem.* 2011 Nov;96(4):624–36.
- 557 11. Lanciego JL, Luquin N, Obeso JA. Functional neuroanatomy of the basal ganglia. *Cold*  
558 *Spring Harb Perspect Med.* 2012 Dec 1;2(12):a009621.
- 559 12. Graybiel AM. Habits, Rituals, and the Evaluative Brain. *Annu Rev Neurosci.* 2008  
560 *Jul*;31(1):359–87.
- 561 13. Maia TV, Frank MJ. From reinforcement learning models to psychiatric and neurological  
562 disorders. *Nat Neurosci.* 2011 Feb;14(2):154–62.
- 563 14. Keiflin R, Janak PH. Dopamine Prediction Errors in Reward Learning and Addiction: From  
564 Theory to Neural Circuitry. *Neuron.* 2015 Oct 21;88(2):247–63.
- 565 15. Takahashi Y, Schoenbaum G, Niv Y. Silencing the critics: understanding the effects of  
566 cocaine sensitization on dorsolateral and ventral striatum in the context of an actor/critic  
567 model. *Front Neurosci.* 2008 Jul;2(1):86–99.
- 568 16. Frank MJ. Dynamic Dopamine Modulation in the Basal Ganglia: A Neurocomputational  
569 Account of Cognitive Deficits in Medicated and Nonmedicated Parkinsonism. *J Cogn*  
570 *Neurosci.* 2005 Jan;17(1):51–72.



- 571 17. Schonberg T, Daw ND, Joel D, O'Doherty JP. Reinforcement Learning Signals in the  
572 Human Striatum Distinguish Learners from Nonlearners during Reward-Based Decision  
573 Making. *J Neurosci*. 2007 Nov 21;27(47):12860–7.
- 574 18. Schultz W. Updating dopamine reward signals. *Curr Opin Neurobiol*. 2013 Apr;23(2):229–  
575 38.
- 576 19. Saunders BT, Richard JM, Margolis EB, Janak PH. Dopamine neurons create Pavlovian  
577 conditioned stimuli with circuit-defined motivational properties. *Nat Neurosci*. 2018  
578 Aug;21(8):1072–83.
- 579 20. Keiflin R, Pribut HJ, Shah NB, Janak PH. Ventral Tegmental Dopamine Neurons  
580 Participate in Reward Identity Predictions. *Curr Biol CB*. 2019 Jan 7;29(1):93-103.e3.
- 581 21. Surmeier DJ, Plotkin J, Shen W. Dopamine and synaptic plasticity in dorsal striatal circuits  
582 controlling action selection. *Curr Opin Neurobiol*. 2009 Dec;19(6):621–8.
- 583 22. Bamford NS, Wightman RM, Sulzer D. Dopamine's Effects on Corticostriatal Synapses  
584 during Reward-Based Behaviors. *Neuron*. 2018 Feb 7;97(3):494–510.
- 585 23. Gerfen CR. The Neostriatal Mosaic: Multiple Levels of Compartmental Organization in the  
586 Basal Ganglia. *Annu Rev Neurosci*. 1992 Mar;15(1):285–320.
- 587 24. Surmeier DJ, Song WJ, Yan Z. Coordinated expression of dopamine receptors in neostriatal  
588 medium spiny neurons. *J Neurosci Off J Soc Neurosci*. 1996 Oct 15;16(20):6579–91.
- 589 25. Kreitzer AC, Malenka RC. Striatal Plasticity and Basal Ganglia Circuit Function. *Neuron*.  
590 2008 Nov;60(4):543–54.

- 591 26. Mannella F, Baldassarre G. Selection of cortical dynamics for motor behaviour by the basal  
592 ganglia. *Biol Cybern.* 2015 Dec;109(6):575–95.
- 593 27. Alexander GE, Crutcher MD. Functional architecture of basal ganglia circuits: neural  
594 substrates of parallel processing. *Trends Neurosci.* 1990 Jul;13(7):266–71.
- 595 28. Gurney K, Prescott TJ, Redgrave P. A computational model of action selection in the basal  
596 ganglia. I. A new functional anatomy. *Biol Cybern.* 2001 May 11;84(6):401–10.
- 597 29. Cui G, Jun SB, Jin X, Pham MD, Vogel SS, Lovinger DM, et al. Concurrent activation of  
598 striatal direct and indirect pathways during action initiation. *Nature.* 2013 Feb  
599 14;494(7436):238–42.
- 600 30. Markowitz JE, Gillis WF, Beron CC, Neufeld SQ, Robertson K, Bhagat ND, et al. The  
601 Striatum Organizes 3D Behavior via Moment-to-Moment Action Selection. *Cell.* 2018  
602 28;174(1):44-58.e17.
- 603 31. London TD, Licholai JA, Szczot I, Ali MA, LeBlanc KH, Fobbs WC, et al. Coordinated  
604 Ramping of Dorsal Striatal Pathways preceding Food Approach and Consumption. *J*  
605 *Neurosci Off J Soc Neurosci.* 2018 Apr 4;38(14):3547–58.
- 606 32. Balleine BW, Liljeholm M, Ostlund SB. The integrative function of the basal ganglia in  
607 instrumental conditioning. *Behav Brain Res.* 2009 Apr;199(1):43–52.
- 608 33. Munhoz RP, Cerasa A, Okun MS. Surgical Treatment of Dyskinesia in Parkinsonâ€™s  
609 Disease. *Front Neurol [Internet].* 2014 Apr 29 [cited 2019 Mar 8];5. Available from:  
610 <http://journal.frontiersin.org/article/10.3389/fneur.2014.00065/abstract>

- 611 34. Brown P, Eusebio A. Paradoxes of functional neurosurgery: clues from basal ganglia  
612 recordings. *Mov Disord Off J Mov Disord Soc.* 2008 Jan;23(1):12–20; quiz 158.
- 613 35. Marsden CD, Obeso JA. The functions of the basal ganglia and the paradox of stereotaxic  
614 surgery in Parkinson's disease. *Brain J Neurol.* 1994 Aug;117 ( Pt 4):877–97.
- 615 36. Piron C, Kase D, Topalidou M, Goillandeau M, Orignac H, N'Guyen T-H, et al. The globus  
616 pallidus pars interna in goal-oriented and routine behaviors: Resolving a long-standing  
617 paradox: GPI, Goal-directed behaviors and habits. *Mov Disord.* 2016 Aug;31(8):1146–54.
- 618 37. Topalidou M, Kase D, Boraud T, Rougier NP. A Computational Model of Dual  
619 Competition between the Basal Ganglia and the Cortex. *eneuro.* 2018;5(6):ENEURO.0339-  
620 17.2018.
- 621 38. Kim T, Hamade KC, Todorov D, Barnett WH, Capps RA, Latash EM, et al. Reward Based  
622 Motor Adaptation Mediated by Basal Ganglia. *Front Comput Neurosci [Internet].* 2017 Mar  
623 31 [cited 2019 Mar 8];11. Available from:  
624 <http://journal.frontiersin.org/article/10.3389/fncom.2017.00019/full>
- 625 39. Reynolds JNJ, Hyland BI, Wickens JR. A cellular mechanism of reward-related learning.  
626 *Nature.* 2001 Sep 6;413(6851):67–70.
- 627 40. Buonomano DV, Merzenich MM. CORTICAL PLASTICITY: From Synapses to Maps.  
628 *Annu Rev Neurosci.* 1998 Mar;21(1):149–86.

- 629 41. Wolters A, Sandbrink F, Schlottmann A, Kunesch E, Stefan K, Cohen LG, et al. A  
630 Temporally Asymmetric Hebbian Rule Governing Plasticity in the Human Motor Cortex. *J*  
631 *Neurophysiol.* 2003 May;89(5):2339–45.
- 632 42. Cohen JD, McClure SM, Yu AJ. Should I stay or should I go? How the human brain  
633 manages the trade-off between exploitation and exploration. *Philos Trans R Soc B Biol Sci.*  
634 2007 May 29;362(1481):933–42.
- 635 43. Prescott TJ, Bryson JJ, Seth AK. Introduction. Modelling natural action selection. *Philos*  
636 *Trans R Soc B Biol Sci.* 2007 Sep 29;362(1485):1521–9.
- 637 44. Hulse SH, Egeth H, Deese J. *The psychology of learning.* 5th ed. New York: McGraw-Hill;  
638 1980. 478 p. (McGraw-Hill series in psychology).
- 639 45. Izquierdo A, Wiedholz LM, Millstein RA, Yang RJ, Bussey TJ, Saksida LM, et al. Genetic  
640 and dopaminergic modulation of reversal learning in a touchscreen-based operant procedure  
641 for mice. *Behav Brain Res.* 2006 Aug 10;171(2):181–8.
- 642 46. Linden J, James AS, McDaniel C, Jentsch JD. Dopamine D2 Receptors in Dopaminergic  
643 Neurons Modulate Performance in a Reversal Learning Task in Mice. *eNeuro.* 2018  
644 Feb;5(1).
- 645 47. Bodi N, Keri S, Nagy H, Moustafa A, Myers CE, Daw N, et al. Reward-learning and the  
646 novelty-seeking personality: a between- and within-subjects study of the effects of  
647 dopamine agonists on young Parkinson’s patients. *Brain.* 2009 Sep 1;132(9):2385–95.

- 648 48. Cools R, Altamirano L, D'Esposito M. Reversal learning in Parkinson's disease depends on  
649 medication status and outcome valence. *Neuropsychologia*. 2006 Jan;44(10):1663–73.
- 650 49. Galvan A, Devergnas A, Wichmann T. Alterations in neuronal activity in basal ganglia-  
651 thalamocortical circuits in the parkinsonian state. *Front Neuroanat* [Internet]. 2015 Feb 5  
652 [cited 2019 Mar 11];9. Available from:  
653 <http://journal.frontiersin.org/Article/10.3389/fnana.2015.00005/abstract>
- 654 50. Humphries MD, Obeso JA, Dreyer JK. Insights into Parkinson's disease from  
655 computational models of the basal ganglia. *J Neurol Neurosurg Psychiatry*. 2018  
656 Nov;89(11):1181–8.
- 657 51. van Albada SJ, Gray RT, Drysdale PM, Robinson PA. Mean-field modeling of the basal  
658 ganglia-thalamocortical system. II. *J Theor Biol*. 2009 Apr;257(4):664–88.
- 659 52. Soikkeli R, Partanen J, Soininen H, Pääkkönen A, Riekkinen P. Slowing of EEG in  
660 Parkinson's disease. *Electroencephalogr Clin Neurophysiol*. 1991 Sep;79(3):159–65.
- 661 53. Cozac VV, Gschwandtner U, Hatz F, Hardmeier M, Rüegg S, Fuhr P. Quantitative EEG  
662 and Cognitive Decline in Parkinson's Disease. *Park Dis*. 2016;2016:1–14.
- 663 54. Grahn JA, Parkinson JA, Owen AM. The role of the basal ganglia in learning and memory:  
664 Neuropsychological studies. *Behav Brain Res*. 2009 Apr;199(1):53–60.
- 665 55. Lawrence AD, Hodges JR, Rosser AE, Kershaw A, ffrench-Constant C, Rubinsztein DC, et  
666 al. Evidence for specific cognitive deficits in preclinical Huntington's disease. *Brain J*  
667 *Neurol*. 1998 Jul;121 ( Pt 7):1329–41.

- 668 56. Gutierrez-Garralda JM, Moreno-Briseño P, Boll M-C, Morgado-Valle C, Campos-Romo A,  
669 Diaz R, et al. The effect of Parkinson's disease and Huntington's disease on human  
670 visuomotor learning. *Eur J Neurosci.* 2013 Jun;n/a-n/a.
- 671 57. Heindel WC, Butters N, Salmon DP. Impaired learning of a motor skill in patients with  
672 Huntington's disease. *Behav Neurosci.* 1988 Feb;102(1):141–7.
- 673 58. Yin HH, Knowlton BJ, Balleine BW. Lesions of dorsolateral striatum preserve outcome  
674 expectancy but disrupt habit formation in instrumental learning. *Eur J Neurosci.* 2004  
675 Jan;19(1):181–9.
- 676 59. Wojtecki L, Groiss SJ, Hartmann CJ, Elben S, Omlor S, Schnitzler A, et al. Deep Brain  
677 Stimulation in Huntington's Disease-Preliminary Evidence on Pathophysiology, Efficacy  
678 and Safety. *Brain Sci.* 2016 Aug 30;6(3).
- 679 60. Koch C, Segev I, editors. *Methods in neuronal modeling: from ions to networks.* 2. ed., 3.  
680 printing. Cambridge, Mass.: MIT Press; 2001. 671 p. (Computational neuroscience).
- 681 61. Pavlides A, Hogan SJ, Bogacz R. Computational Models Describing Possible Mechanisms  
682 for Generation of Excessive Beta Oscillations in Parkinson's Disease. Graham LJ, editor.  
683 *PLOS Comput Biol.* 2015 Dec 18;11(12):e1004609.
- 684 62. Schultz W. Behavioral dopamine signals. *Trends Neurosci.* 2007 May;30(5):203–10.
- 685 63. Kalia LV, Lang AE. Parkinson's disease. *The Lancet.* 2015 Aug;386(9996):896–912.
- 686 64. Schapira AHV. Neurobiology and treatment of Parkinson's disease. *Trends Pharmacol Sci.*  
687 2009 Jan;30(1):41–7.

- 688 65. Kita H, Kita T. Role of Striatum in the Pause and Burst Generation in the Globus Pallidus  
689 of 6-OHDA-Treated Rats. *Front Syst Neurosci* [Internet]. 2011 [cited 2019 Mar 11];5.  
690 Available from: <http://journal.frontiersin.org/article/10.3389/fnsys.2011.00042/abstract>
- 691 66. Mallet N, Ballion B, Le Moine C, Gonon F. Cortical inputs and GABA interneurons  
692 imbalance projection neurons in the striatum of parkinsonian rats. *J Neurosci Off J Soc*  
693 *Neurosci*. 2006 Apr 5;26(14):3875–84.
- 694 67. Miller WC, DeLong MR. Altered Tonic Activity of Neurons in the Globus Pallidus and  
695 Subthalamic Nucleus in the Primate MPTP Model of Parkinsonism. In: Carpenter MB,  
696 Jayaraman A, editors. *The Basal Ganglia II* [Internet]. Boston, MA: Springer US; 1987  
697 [cited 2019 Mar 11]. p. 415–27. Available from: [http://link.springer.com/10.1007/978-1-](http://link.springer.com/10.1007/978-1-4684-5347-8_29)  
698 [4684-5347-8\\_29](http://link.springer.com/10.1007/978-1-4684-5347-8_29)
- 699 68. Pan HS, Walters JR. Unilateral lesion of the nigrostriatal pathway decreases the firing rate  
700 and alters the firing pattern of globus pallidus neurons in the rat. *Synapse*. 1988;2(6):650–6.
- 701 69. Sterio D, Beri? A, Dogali M, Fazzini E, Alfaro G, Devinsky O. Neurophysiological  
702 properties of pallidal neurons in Parkinson’s disease. *Ann Neurol*. 1994 May;35(5):586–91.
- 703 70. Doudet DJ, Gross C, Arluison M, Bioulac B. Modifications of precentral cortex discharge  
704 and EMG activity in monkeys with MPTP-induced lesions of DA nigral neurons. *Exp Brain*  
705 *Res*. 1990;80(1):177–88.
- 706 71. Bergman H, Wichmann T, Karmon B, DeLong MR. The primate subthalamic nucleus. II.  
707 Neuronal activity in the MPTP model of parkinsonism. *J Neurophysiol*. 1994  
708 Aug;72(2):507–20.

- 709 72. Hassani OK, Mouroux M, Féger J. Increased subthalamic neuronal activity after nigral  
710 dopaminergic lesion independent of disinhibition via the globus pallidus. *Neuroscience*.  
711 1996 May;72(1):105–15.
- 712 73. Hutchison WD, Lozano AM, Davis KD, Saint-Cyr JA, Lang AE, Dostrovsky JO.  
713 Differential neuronal activity in segments of globus pallidus in Parkinson’s disease patients.  
714 *Neuroreport*. 1994 Jul 21;5(12):1533–7.
- 715 74. Wichmann T, Bergman H, Starr PA, Subramanian T, Watts RL, DeLong MR. Comparison  
716 of MPTP-induced changes in spontaneous neuronal discharge in the internal pallidal  
717 segment and in the substantia nigra pars reticulata in primates. *Exp Brain Res*. 1999  
718 Apr;125(4):397–409.
- 719 75. Reiner A, Dragatsis I, Dietrich P. Genetics and Neuropathology of Huntington’s Disease.  
720 In: *International Review of Neurobiology* [Internet]. Elsevier; 2011 [cited 2019 Mar 11]. p.  
721 325–72. Available from:  
722 <https://linkinghub.elsevier.com/retrieve/pii/B9780123813282000146>
- 723 76. Sharp AH, Ross CA. Neurobiology of Huntington’s Disease. *Neurobiol Dis*. 1996  
724 Feb;3(1):3–15.

725



726 **Figure legends**

727 *Figure 4: The structure of the cortico-basal ganglia-thalamo-cortical loop model. The BG receives inputs*  
728 *from the prefrontal cortex (PFC) signaling the conditioning stimulus (CS) as well as reward inputs via*  
729 *substantia nigra pars compacta (SNc). The SNc forms a dopamine reward prediction error (RPE) signal,*  
730 *which governs plasticity of the connections from the PFC (DA LTP/LTD; green). The BG input structure,*  
731 *striatum, contains medium spiny neurons (MSNs), which cluster in 2 subtypes: D1 and D2 dopamine*  
732 *receptor-containing (direct and indirect pathways respectively). The rest of the nuclei are the globus*  
733 *pallidus external (GPe), subthalamic nucleus (STN), and the output structures: substantia nigra pars*  
734 *reticulata and globus pallidus internal (SNr/GPi). The loop is completed by connections from and to*  
735 *premotor cortices/thalamus (PMC/Thal). The two channels of the loop are colored purple/blue.*

736 *Figure 5: Healthy BG facilitates learning of the initial task and reversal. Trial-by-trial dynamics of the PFC*  
737 *activity and underlying modulation of synaptic weights in the Healthy BG model. Trials 1-199:initial*  
738 *learning; trials 200-500: reversal (A) A higher activity of PMC1 (blue) manifests choice 1, whereas higher*  
739 *activity of PMC2 manifests choice 2. (B) Synaptic weights of the PFC to striatum connections. (C) Synaptic*  
740 *weights of the PFC to PMC connections.*

741 *Figure 6: Within-trial dynamics of neural activity in the model with healthy BG. The network is biased*  
742 *towards option 1 as the PFC-D1-MSN1 and PFC-D2MSN2 connection weights are both set at 0.7, which*  
743 *corresponds to a trial in late initial learning phase (~100). Activation of the D1-MSN1 group inhibits GPi1*  
744 *neurons, and thus disinhibits PMC1. GPi2 neurons remain excited and inhibit PMC2.*

745 *Figure 4: Reward, expected reward (A), and the RPE (B) during initial learning and reversal trials in the*  
746 *model with healthy BG. As before, reversal starts at trial 200 (vertical black line). Note a greater RPE at*  
747 *the beginning of the initial learning compared to the reversal.*

748 *Figure 5: Decreased learning performance and increased variability of PMC activity in the model with*  
749 *mild-parkinsonian BG. Trial-by-trial dynamics of PMC activity (A) and underlying modulation of synaptic*  
750 *weights (B,C) in the model with mild-parkinsonian BG state. Notation is the same as in Fig. 2. Note the*  
751 *difference in scale in panels (B) and (C) compared to Fig. 2*

752 *Figure 6: Within-trial dynamics of neural activity in the model with healthy (left) and parkinsonian (right)*  
753 *BG. Panels A, B, and C show firing rates for PMC, D1 MSNs and D2 MSNs respectively. In the healthy case,*  
754 *the firing rates equilibrate within 500 ms. In the parkinsonian case, oscillations in the firing rate emerge*  
755 *and persist. All plastic synaptic connections are set to zero to simulate the state of no bias towards any*  
756 *choice.*

757 *Figure 7: In the PD state model, the variability of PMC activity and switching between choice 1 and 2*  
758 *cease at the DBS onset. Trial-by-trial dynamics of the PMC activity and underlying modulation of synaptic*  
759 *weights in the PD BG model with simulated DBS starting at trial 150. Same notation as in Fig. 2. (A) The*  
760 *levels of PMC1 and PMC2 activity (choice 1 vs. 2) at the end of each trial (B) Synaptic weights of the PFC*  
761 *to striatum connections reflect rewarded choices. (C) Synaptic weight of the PFC to PMC1 connection*  
762 *keep growing after DBS onset, and during reversal.*

763 *Figure 8: Random switches between rewarded and unrewarded options persist in the model with*  
764 *Huntington state BG. Trial-to-trial dynamics of PFC neural activity (A) and underlying dynamics of*  
765 *synaptic weights (B,C). The notation is the same as in Fig. 2.*

766 *Figure 9: Occasional choice of the nonrewarded option made in the model with Huntington state BG.*  
767 *Within-trial dynamics of PMC, D1 MSN, and GPi neural activity is shown. The greater activity of PMC2*  
768 *groups signifies that the action 2 is chosen, even though choice 1 is made preferable in the model by*  
769 *potentiating PFC-PMC1, PFC-D1 MSN1 and PFC-D2 MSN2 connections:  $W_{PFC1-PMC1} = 0.04$ ,*

770  $W_{PFC1-D1MSN1} = 1, W_{PFC1-D2MSN2} = 1$

771 *Figure 10: In the HD state, the random switches between choice 1 and 2 cease shortly after, but not at*  
 772 *the DBS onset. Trial-by-trial dynamics of the PMC activity and underlying modulation of synaptic weights*  
 773 *in the Huntington BG model with simulated DBS starting at trial 100. Same notation as in Fig. 2. (A) The*  
 774 *levels of PMC1 and PMC2 activity (choice 1 vs. 2) at the end of each trial (B) Synaptic weights of the PFC*  
 775 *to striatum connections reflect rewarded choices. (C) Synaptic weight of the PFC to PMC1 connection*  
 776 *keep growing after DBS onset, and during reversal.*

777 **Tables**

778 Table 1: Parameters of the healthy BG model state

| Parameter                       | Value used in this model                                   |
|---------------------------------|------------------------------------------------------------|
| $input\_pfc$                    | 3.0                                                        |
| $w_{PFC-D1_m}$ & $w_{PFC-D2_m}$ | Randomly set between 0 and 0.001, updated after each trial |
| $w_{PMC-D1}$                    | 2.0                                                        |
| $w_{PMC-D2}$                    | 2.0                                                        |
| $dr_{GPe}$                      | 2.0                                                        |
| $w_{D2-GPe}$                    | 2.0                                                        |
| $dr_{STN}$                      | 1.0                                                        |
| $w_{GPe-STN}$                   | 1.0                                                        |
| $dr_{GPI}$                      | 0.2                                                        |
| $w_{D1-GPI}$                    | 1.4                                                        |
| $w_{STN-GPI}$                   | 1.6                                                        |
| $dr_{PMC}$                      | 1.3                                                        |

|                   |                               |
|-------------------|-------------------------------|
| $W_{PFC-PMC_m}$   | Initial 0; varies with trials |
| $W_{GPI-PMC}$     | 1.8                           |
| $W_{PMC_m-PMC_n}$ | 1.6                           |
| $\lambda$         | 0.0005                        |
| $\lambda_{CM}$    | 0.0005                        |

779

780 Table 2: Changes in the parameters of the model that reproduce Parkinsonian BG state.

| Parameter     | Value in Healthy state | Value in mild Parkinsonian state | Justifying literature |
|---------------|------------------------|----------------------------------|-----------------------|
| $W_{PMC-D1}$  | 2.0                    | 1.0                              | (65,66)               |
| $W_{PMC-D2}$  | 2.0                    | 3.0                              | (65,66)               |
| $dr_{STN}$    | 1.0                    | 1.1                              | (71,72)               |
| $dr_{GPI}$    | 0.2                    | 0.3                              | (73,67,74)            |
| $W_{D1-GPI}$  | 1.4                    | 1.0                              | (73,67,74)            |
| $W_{STN-GPI}$ | 1.6                    | 2.0                              | (73,67,74)            |

781

782 Table 3: Changes in the parameters of the model that reproduce Huntington disease state.

| Parameter     | Value in Healthy state | Value in Grade 2 HD State | Justifying literature |
|---------------|------------------------|---------------------------|-----------------------|
| $input_{pfc}$ | 3.0                    | 0.7                       | (75,76)               |
| $W_{D2-GPe}$  | 2.0                    | 0.2                       | (75,76)               |
| $W_{GPe-STN}$ | 1.0                    | 0.6                       | (75,76)               |
